# Supplementary material for: The bacterial composition signatures of perianal abscess and origin of infecting microbes
Source: PeerJ. 2025 Jan 23;13:e18855. doi: 10.7717/peerj.18855 (PMC11766672; doi:10.7717/peerj.18855)
Supplement: Supplemental Information 1 [file peerj-13-18855-s001.xlsx]

## Sheet: Sheet1
Table S1. Patient information
Sample ID	Sex	Age	Condition	Date of sampling	Name of the surgery
N100	male	37	Perianal abscess	2023-07-19	Incision and drainage of the perianal abscess
N105	male	52	Perianal abscess	2023-07-25	Incision and drainage of the perianal abscess
N107	male	27	Perianal abscess	2023-07-27	Incision and drainage of the perianal abscess
N109	male	40	Perianal abscess	2023-07-28	Incision and drainage of the perianal abscess
N110	male	47	Perianal abscess	2023-07-31	Incision and drainage of the perianal abscess
N111	male	32	Perianal abscess	2023-07-31	Incision and drainage of the perianal abscess
N112	female	32	Perianal abscess	2023-07-31	Incision and drainage of the perianal abscess
N113	male	36	Perianal abscess	2023-08-01	Incision and drainage of the perianal abscess
N117	female	35	Perianal abscess	2023-08-03	Incision and drainage of the perianal abscess
N120	male	26	Perianal abscess	2023-08-03	Incision and drainage of the perianal abscess
N124	male	34	Perianal abscess	2023-08-08	Incision and drainage of the perianal abscess
N125	male	44	Perianal abscess	2023-08-08	Incision and drainage of the perianal abscess
N126	male	39	Perianal abscess	2023-08-10	Incision and drainage of the perianal abscess
N127	male	44	Perianal abscess	2023-08-10	Incision and drainage of the perianal abscess
N129	male	21	Perianal abscess	2023-08-11	Incision and drainage of the perianal abscess
N136	male	46	Perianal abscess	2023-08-18	Incision and drainage of the perianal abscess
N140	male	28	Perianal abscess	2023-08-21	Incision and drainage of the perianal abscess
N141	male	11	Perianal abscess	2023-08-21	Incision and drainage of the perianal abscess
N142	male	35	Perianal abscess	2023-08-21	Incision and drainage of the perianal abscess
N144	male	77	Perianal abscess	2023-08-21	Incision and drainage of the perianal abscess
N145	male	27	Perianal abscess	2023-08-23	Incision and drainage of the perianal abscess
N146	male	29	Perianal abscess	2023-08-24	Incision and drainage of the perianal abscess
N147	male	21	Perianal abscess	2023-08-24	Incision and drainage of the perianal abscess
N148	female	27	Perianal abscess	2023-08-25	Incision and drainage of the perianal abscess
N154	male	34	Perianal abscess	2023-08-30	Incision and drainage of the perianal abscess
N155	male	51	Perianal abscess	2023-08-31	Incision and drainage of the perianal abscess
N157	male	56	Perianal abscess	2023.8.31	Incision and drainage of the perianal abscess
N158	male	65	Perianal abscess	2023-09-04	Incision and drainage of the perianal abscess
N159	male	53	Perianal abscess	2023-09-04	Incision and drainage of the perianal abscess
N163	male	41	Perianal abscess	2023-09-05	Incision and drainage of the perianal abscess
N164	male	17	Perianal abscess	2023-09-05	Incision and drainage of the perianal abscess
N165	male	45	Perianal abscess	2023-09-06	Incision and drainage of the perianal abscess
N167	male	33	Perianal abscess	2023-09-07	Incision and drainage of the perianal abscess
N18	male	39	Perianal abscess	2023-04-17	Incision and drainage of the perianal abscess
N19	male	25	Perianal abscess	2023-04-17	Incision and drainage of the perianal abscess
N20	male	73	Perianal abscess	2023-04-17	Incision and drainage of the perianal abscess
N22	female	25	Perianal abscess	2023-04-21	Incision and drainage of the perianal abscess
N23	male	53	Perianal abscess	2023-04-24	Incision and drainage of the perianal abscess
N25	male	32	Perianal abscess	2023-04-25	Incision and drainage of the perianal abscess
N32	male	22	Perianal abscess	2023-05-05	Incision and drainage of the perianal abscess
N35	female	31	Perianal abscess	2023-05-09	Incision and drainage of the perianal abscess
N38	male	64	Perianal abscess	2023-05-09	Incision and drainage of the perianal abscess
N40	male	41	Perianal abscess	2023-05-10	Incision and drainage of the perianal abscess
N41	male	66	Perianal abscess	2023-05-11	Incision and drainage of the perianal abscess
N42	male	27	Perianal abscess	2023-05-11	Incision and drainage of the perianal abscess
N46	male	31	Perianal abscess	2023-05-15	Incision and drainage of the perianal abscess
N50	male	32	Perianal abscess	2023-05-18	Incision and drainage of the perianal abscess
N54	male	38	Perianal abscess	2023-05-31	Incision and drainage of the perianal abscess
N55	male	40	Perianal abscess	2023-06-01	Incision and drainage of the perianal abscess
N64	male	33	Perianal abscess	2023-06-08	Incision and drainage of the perianal abscess
N65	male	60	Perianal abscess	2023-06-08	Incision and drainage of the perianal abscess
N66	male	63	Perianal abscess	2023-06-08	Incision and drainage of the perianal abscess
N67	male	44	Perianal abscess	2023-06-08	Incision and drainage of the perianal abscess
N69	male	29	Perianal abscess	2023-06-13	Incision and drainage of the perianal abscess
N70	male	57	Perianal abscess	2023-06-13	Incision and drainage of the perianal abscess
N71	male	47	Perianal abscess	2023-06-14	Incision and drainage of the perianal abscess
N73	male	34	Perianal abscess	2023-06-19	Incision and drainage of the perianal abscess
N78	male	25	Perianal abscess	2023-06-26	Incision and drainage of the perianal abscess
N81	male	21	Perianal abscess	2023-07-03	Incision and drainage of the perianal abscess
N82	male	36	Perianal abscess	2023-07-03	Incision and drainage of the perianal abscess
N83	female	31	Perianal abscess	2023-07-03	Incision and drainage of the perianal abscess
N84	male	27	Perianal abscess	2023-07-04	Incision and drainage of the perianal abscess
N85	male	37	Perianal abscess	2023-07-05	Incision and drainage of the perianal abscess
N86	male	31	Perianal abscess	2023-07-05	Incision and drainage of the perianal abscess
N87	male	23	Perianal abscess	2023-07-06	Incision and drainage of the perianal abscess
N88	male	41	Perianal abscess	2023-07-07	Incision and drainage of the perianal abscess
N89	male	34	Perianal abscess	2023-07-07	Incision and drainage of the perianal abscess
N90	female	43	Perianal abscess	2023-07-08	Incision and drainage of the perianal abscess
N91	male	49	Perianal abscess	2023-07-10	Incision and drainage of the perianal abscess
N93	male	46	Perianal abscess	2023-07-12	Incision and drainage of the perianal abscess
N94	male	37	Perianal abscess	2023-07-13	Incision and drainage of the perianal abscess
N95	female	33	Perianal abscess	2023-07-13	Incision and drainage of the perianal abscess
N96	male	30	Perianal abscess	2023-07-17	Incision and drainage of the perianal abscess
N98	female	25	Perianal abscess	2023-07-17	Incision and drainage of the perianal abscess
N99	male	36	Perianal abscess	2023-07-18	Incision and drainage of the perianal abscess
