# Supplementary material for: The bacterial composition signatures of perianal abscess and origin of infecting microbes
Source: PeerJ. 2025 Jan 23;13:e18855. doi: 10.7717/peerj.18855 (PMC11766672; doi:10.7717/peerj.18855)
Supplement: Supplemental Information 2 [file peerj-13-18855-s002.xlsx]

## Sheet: Sheet1
Table S2. Clustering of abscess microbiomes
Subject	Sex	Age	Cluster
N100	male	37	1
N142	male	35	1
N22	female	25	1
N89	male	34	1
N19	male	25	1
N70	male	57	1
N105	male	52	2
N107	male	27	2
N146	male	29	2
N148	female	27	2
N155	male	51	2
N20	male	73	2
N41	male	66	2
N46	male	31	2
N64	male	33	2
N71	male	47	2
N85	male	37	2
N109	male	40	3
N124	male	34	3
N164	male	17	3
N25	male	32	3
N35	female	31	3
N42	male	27	3
N82	male	36	3
N83	female	31	3
N95	female	33	3
N110	male	47	4
N112	female	32	4
N127	male	44	4
N136	male	46	4
N159	male	53	4
N40	male	41	4
N66	male	63	4
N111	male	32	5
N113	male	36	5
N120	male	26	5
N32	male	22	5
N38	male	64	5
N86	male	31	5
N96	male	30	5
N117	female	35	6
N141	male	11	6
N145	male	27	6
N165	male	45	6
N18	male	39	6
N69	male	29	6
N73	male	34	6
N78	male	25	6
N94	male	46	6
N144	male	77	7
N147	male	21	7
N65	male	60	7
N88	male	41	7
N125	male	44	7
N126	male	39	8
N163	male	41	8
N84	male	27	8
N91	male	49	8
N93	male	36	8
N129	male	21	9
N157	male	56	9
N158	male	65	9
N167	male	33	9
N23	male	53	9
N50	male	32	9
N54	male	38	9
N55	male	40	9
N67	male	44	9
N90	female	43	9
N98	female	25	9
N99	male	36	9
N140	male	28	10
N154	male	34	10
N81	male	21	10
N87	male	23	10
