# Supplementary material for: The bacterial composition signatures of perianal abscess and origin of infecting microbes
Source: PeerJ. 2025 Jan 23;13:e18855. doi: 10.7717/peerj.18855 (PMC11766672; doi:10.7717/peerj.18855)
Supplement: Supplemental Information 3 [file peerj-13-18855-s003.xlsx]

## Sheet: Sheet1
Table S3. Tracking prominent source of microbiomes in anal abscess.
N100	abundance	skin	feces	abscess		Prominent source
	Bacteroides	0.00199907	0.00204294	0.420344		N100	Neither
	Fusobacterium	0.000101805	0.000104498	0.337173
	Dialister	0.126516	0.115664	0.0874939
	Peptostreptococcus	0	0.000125398	0.0441324
	Prevotella	0.271161	0.466276	0.0158634
N105	abundance	skin	feces	abscess		Prominent source
	Bacteroides	0.101324	0.308768	0.251536		N105	Both
	Corynebacterium	0.149631	5.75171e-05	0.111275
	Faecalibacterium	0.0537432	0.0887981	0.0691608
	Staphylococcus	0.210946	2.46502e-05	0.0562881
	Subdoligranulum	0.0302273	0.0552082	0.0525628
N107	abundance	skin	feces	abscess		Prominent source
	Prevotella	0.0279024	0.264838	0.24809		N107	Feces
	Bacteroides	0.00852902	0.127137	0.162718
	Faecalibacterium	0.00390274	0.10298	0.112084
	Collinsella	0.00870004	0.00452774	0.056371
	Staphylococcus	0.499327	5.46388e-05	0.0461691
N109	abundance	skin	feces	abscess		Prominent source
	Prevotella	0.178175	0.0102982	0.540711		N109	Skin
	Bacteroides	0.408931	0.470178	0.145524
	Lachnospiraceae family	0.111496	0.142774	0.0450019
	Streptococcus	0.00268885	0.000280341	0.0305513
	[Ruminococcus]_torques_group	0.0625827	0.0567376	0.0295827
N110	abundance	skin	feces	abscess		Prominent source
	Staphylococcus	0.105423	0.0258031	0.183229		N110	Both
	Bacteroides	0.00440929	0.312145	0.151176
	Anaerococcus	0.292426	0.123366	0.125995
	Finegoldia	0.218833	0.129205	0.112757
	Peptoniphilus	0.14822	0.0141906	0.0271968
N111	abundance	skin	feces	abscess		Prominent source
	Enterobacteriaceae family	0.00155242	0.0119995	0.967096		N111	Neither
	Escherichia-Shigella	0.0149397	0.114971	0.00686034
	Prevotella	0.00156177	0.00406103	0.0028373
	Parvimonas	0.000233798	0	0.00199034
	Bacteroides	0.483788	0.497625	0.00196917
N112	abundance	skin	feces	abscess		Prominent source
	Staphylococcus	0.518244	0.00228063	0.983748		N112	Skin
	Acinetobacter	0.00380804	6.89358e-05	0.00264051
	Gardnerella	0.0664735	0.0046704	0.00119452
	Enterococcus	0.0786579	0.000505529	0.00110021
	Aeromonas	8.19285e-05	0	0.000817302
N113	abundance	skin	feces	abscess		Prominent source
	Enterobacteriaceae family	0.0412024	0	0.932411		N113	Neither
	Escherichia-Shigella	0.0850892	0.0766646	0.0064068
	Bacteroides	0.185652	0.236402	0.00586761
	Staphylococcus	0.000674634	5.67921e-05	0.0054553
	Megamonas	0.249174	0.205228	0.00428177
N117	abundance	skin	feces	abscess		Prominent source
	Bacteroides	0.28343	0.671338	0.686931		N117	Feces
	Erysipelatoclostridium	0.0915846	0.108243	0.110826
	Lachnoclostridium	0.0370394	0.0458857	0.0359658
	[Ruminococcus]_gnavus_group	0.151996	0.00892799	0.022204
	Blautia	0.0161808	0.00949897	0.019975
N120	abundance	skin	feces	abscess		Prominent source
	Enterobacteriaceae family	0.878211	0.0102549	0.95933		N120	Skin
	Porphyromonas	0.0205908	0.000154364	0.0123336
	Acinetobacter	0.00169196	8.23274e-05	0.00158476
	Parabacteroides	0.00025539	0.641094	0.0012747
	Enterococcus	0.00130887	0.215194	0.000689026
N124	abundance	skin	feces	abscess		Prominent source
	Prevotella	0.585025	0.288547	0.154154		N124	Both
	Sneathia	0	0.000306808	0.0926629
	Porphyromonas	0	0.00013828	0.0873808
	Fenollaria	0	0.000155565	0.0750279
	Peptoniphilus	0.00015411	9.07461e-05	0.063301
N125	abundance	skin	feces	abscess		Prominent source
	Bacteroides	0.0974599	0.238189	0.372071		N125	Feces
	Escherichia-Shigella	0.0616364	0.0602508	0.170854
	Fusobacterium	0.0304946	0	0.149088
	Prevotella	0.0841206	0.0925764	0.0700572
	Anaeroglobus	0	0	0.0682413
N126	abundance	skin	feces	abscess		Prominent source
	Parvimonas	1.99538e-05	2.1332e-05	0.166849		N126	Neither
	Acinetobacter	0.00241042	0	0.160301
	Prevotella	0.00933837	0.28436	0.113279
	Bacteroides	0.0122995	0.322747	0.0758287
	Pseudomonas	0.000570678	0	0.0603587
N127	abundance	skin	feces	abscess		Prominent source
	Prevotella	0.194755	0.0438242	0.233083		N127	Both
	Staphylococcus	0.000338558	0.361579	0.211349
	Finegoldia	0.000238529	0.037391	0.110315
	Anaerococcus	0.000323169	0.055629	0.0748465
	Peptostreptococcus	2.30835e-05	0.00133605	0.0703313
N129	abundance	skin	feces	abscess		Prominent source
	Escherichia-Shigella	0.0447803	0.257213	0.264603		N129	Feces
	Peptostreptococcus	0.000222835	3.5078e-05	0.215232
	Fusobacterium	0.000730803	0.000547217	0.169673
	Parvimonas	0.000800289	5.61248e-05	0.102563
	Proteus	0.094633	0.046324	0.0915513
N136	abundance	skin	feces	abscess		Prominent source
	Prevotella	0.194014	0.12369	0.264675		N136	Skin
	Porphyromonas	0.220794	0.00738264	0.0984479
	Peptoniphilus	0.0884255	0.00793752	0.0837181
	Finegoldia	0.0556009	0.00381828	0.0786945
	Dialister	0.0269265	0.0207984	0.0526426
N140	abundance	skin	feces	abscess		Prominent source
	Bacteroides	0.0110744	0.243979	0.965442		N140	Feces
	Streptococcus	0.0280765	0.00334801	0.0140368
	Escherichia-Shigella	0.0787989	0.122751	0.00368467
	Acinetobacter	0.00675909	0	0.00140758
	Megamonas	0.00900446	0.13795	0.00101377
N141	abundance	skin	feces	abscess		Prominent source
	Bacteroides	0.229908	0.307361	0.635535		N141	Both
	Escherichia-Shigella	0.229769	0.242702	0.273405
	Megamonas	0.274094	0.288653	0.0256276
	Morganella	0.000256476	0.00376267	0.0166412
	Lachnospiraceae family	0.0149842	0.023904	0.00399552
N142	abundance	skin	feces	abscess		Prominent source
	Bacteroides	0.154715	0.248858	0.231888		N142	Both
	Streptococcus	0.0542145	0.0132556	0.108129
	Gemella	0.0176214	0.00166527	0.0850803
	Escherichia-Shigella	0.0276744	0.0478551	0.0762609
	Aeromonas	0	0	0.0744801
N144	abundance	skin	feces	abscess		Prominent source
	Fusobacterium	0.00162744	0.000371014	0.381975		N144	Neither
	Prevotella	0.0840732	0.213791	0.192286
	Acinetobacter	0.00229631	0.000507305	0.0831882
	Parvimonas	0.000281181	3.02869e-05	0.0543625
	Anaeroglobus	0	0	0.0491667
N145	abundance	skin	feces	abscess		Prominent source
	Bacteroides	0.221588	0.307604	0.718276		N145	Both
	Aeromonas	3.23486e-05	0.000849746	0.128385
	Pseudomonas	0.000266876	0.000609179	0.0575337
	Faecalibacterium	0.0452961	0.143339	0.0172137
	Escherichia-Shigella	0.0763993	0.180654	0.0106193
N146	abundance	skin	feces	abscess		Prominent source
	Prevotella	0.290777	0.321213	0.245114		N146	Both
	Faecalibacterium	0.0412752	0.0548614	0.101482
	Holdemanella	0.00862622	0.0112208	0.0620156
	Bacteroides	0.0222998	0.0472425	0.0596949
	Blautia	0.00520349	0.014464	0.0562942
N147	abundance	skin	feces	abscess		Prominent source
	Fusobacterium	8.04767e-06	1.28642e-05	0.746622		N147	Neither
	Escherichia-Shigella	0.00154515	0.00022298	0.176625
	Bilophila	0.000394336	0.000192963	0.0482665
	Bacteroides	0.346758	0.483557	0.00233791
	Acinetobacter	0.00156527	3.00165e-05	0.00128208
N148	abundance	skin	feces	abscess		Prominent source
	Bacteroides	0.0316534	0.285867	0.21728		N148	Feces
	Akkermansia	0.054602	0.144511	0.112365
	Escherichia-Shigella	0.05471	0.0790089	0.0817127
	Megamonas	0.0574897	0.217367	0.072234
	Prevotella	0.0067811	0.0440703	0.0673323
N154	abundance	skin	feces	abscess		Prominent source
	Bacteroides	0.12306	0.194591	0.967772		N154	Both
	Escherichia-Shigella	0.230494	0.186744	0.0199386
	Enterobacteriaceae family	0.00165494	0.000664021	0.00187434
	Acinetobacter	0.000273145	0.000202446	0.00164669
	Bilophila	0.000333398	0.000996032	0.00100926
N155	abundance	skin	feces	abscess		Prominent source
	Prevotella	0.100275	0.258341	0.352608		N155	Feces
	Fusobacterium	0.00462073	0.196216	0.0945049
	Faecalibacterium	0.00202856	0.0663896	0.0583094
	Bacteroides	0.00526587	0.0694224	0.0543153
	Streptococcus	0.00095489	0.000192511	0.0326212
N157	abundance	skin	feces	abscess		Prominent source
	Escherichia-Shigella	0.126368	0.181979	0.286129		N157	Feces
	Bacteroides	0.0852574	0.293132	0.210341
	Veillonella	0.0674455	0.0537237	0.0973196
	Enterobacteriaceae family	0.138434	0.104078	0.0833798
	Faecalibacterium	0.0332487	0.0707272	0.0683517
N158	abundance	skin	feces	abscess		Prominent source
	Prevotella	0.19147	0.412685	0.641811		N158	Feces
	Escherichia-Shigella	0.00255727	0.0377115	0.313676
	Campylobacter	2.03362e-05	0.00501959	0.0223555
	Bacteroides	0.04053	0.00211111	0.00685851
	Aeromonas	0.32817	0.260525	0.00449229
N159	abundance	skin	feces	abscess		Prominent source
	Staphylococcus	0.241346	0.149527	0.991772		N159	Skin
	Corynebacterium	0.271949	0.00104525	0.00114177
	Aeromonas	0	0.000102475	0.000523749
	Anaerococcus	0.18796	0.00376597	0.000445187
	Escherichia-Shigella	0.00325388	0.261507	0.000246162
N163	abundance	skin	feces	abscess		Prominent source
	Aeromonas	0	0.000114903	0.359223		N163	Neither
	Prevotella	0.204542	0.328597	0.218968
	Pseudomonas	0	3.49704e-05	0.139736
	Alloprevotella	0.0102682	0.0159066	0.0220028
	Corynebacterium	0.120716	0.00150873	0.0187283
N164	abundance	skin	feces	abscess		Prominent source
	Prevotella	0.215059	0.309503	0.2082		N164	Both
	Porphyromonas	0.158199	0.000234768	0.155962
	Fenollaria	0.00867983	0.000265201	0.0827816
	Moryella	0.00669377	0.000382585	0.0485429
	Peptoniphilus	0.107424	0.000173902	0.0471479
N165	abundance	skin	feces	abscess		Prominent source
	Bacteroides	0.35823	0.293357	0.966859		N165	Both
	Aeromonas	0	0.0026968	0.0105615
	Pseudomonas	0.000150986	0.00201254	0.00658993
	Escherichia-Shigella	0.105662	0.104679	0.00177987
	Prevotella	0.00166084	0.00827825	0.00126503
N167	abundance	skin	feces	abscess		Prominent source
	Escherichia-Shigella	0.0766167	0.0826461	0.423568		N167	Feces
	Bacteroides	0.0767617	0.194864	0.156947
	Parabacteroides	0.0313185	0.035742	0.0661343
	Anaerococcus	0.0632023	0.0139875	0.0554786
	Finegoldia	0.0846357	0.0405776	0.037412
N18	abundance	skin	feces	abscess		Prominent source
	Bacteroides	0.415672	0.618074	0.465692		N18	Feces
	Escherichia-Shigella	0.00278627	0.0609204	0.150869
	Pseudomonas	3.49157e-05	0.0014849	0.096914
	Bilophila	0.000160612	0	0.0806984
	Azospirillum	0	1.97986e-05	0.0781944
N19	abundance	skin	feces	abscess		Prominent source
	Bacteroides	0.0132356	0.0615449	0.275655		N19	Both
	Prevotella	0.184462	0.102093	0.199034
	Bilophila	0.00025359	0.000100866	0.0675007
	Faecalibacterium	0.0006362	0.0130453	0.0526672
	Dialister	0.0520928	0.000336219	0.0524851
N20	abundance	skin	feces	abscess		Prominent source
	Prevotella	0.196089	0.00434234	0.188841		N20	Skin
	Bacteroides	0.0104809	0.000504272	0.134858
	Parabacteroides	0.00148432	0.00547696	0.0738549
	Alloprevotella	0.00116706	0	0.0630165
	Escherichia-Shigella	0.00518945	0.916011	0.0542964
N22	abundance	skin	feces	abscess		Prominent source
	Bacteroides	0.113056	0.303604	0.453287		N22	Feces
	Prevotella	2.4135e-05	0	0.106919
	Dialister	0.00333867	0.00116979	0.0808396
	Fusobacterium	0.0001609	0	0.066992
	Muribaculaceae	0	0	0.0500259
N23	abundance	skin	feces	abscess		Prominent source
	Escherichia-Shigella	0.0122463	0.316135	0.571969		N23	Feces
	Veillonella	0.00622782	0.237988	0.0899527
	[Ruminococcus]_gnavus_group	0	0.0810139	0.079433
	Blautia	8.37354e-05	0.0162535	0.0381775
	Enterococcus	0.00377856	0.0472079	0.0327587
N25	abundance	skin	feces	abscess		Prominent source
	Porphyromonas	0.0092015	0.0967539	0.155936		N25	Feces
	Fusobacterium	0.00393948	0.047421	0.155618
	Prevotella	0.0185625	0.143882	0.12633
	Bacteroides	0.00310469	0.106188	0.0692468
	Peptoniphilus	0.0487089	0.0662889	0.0583867
N32	abundance	skin	feces	abscess		Prominent source
	Enterobacteriaceae family	0.164139	0.238235	0.507058		N32	Feces
	Escherichia-Shigella	0.00911794	0.495833	0.399015
	Enterococcus	0.0177116	0.239811	0.0693527
	Staphylococcus	0.392145	0.000633926	0.0229487
	Acinetobacter	0.0481211	0.00107208	0.000265442
N35	abundance	skin	feces	abscess		Prominent source
	Prevotella	0.0285775	0.111347	0.351089		N35	Feces
	Porphyromonas	0.0091006	0.00750818	0.215901
	Peptostreptococcus	0.00287285	0.00469028	0.0754106
	Muribaculaceae	0.00239566	0.00859677	0.0722159
	Azospirillum	0.239474	0.142556	0.0449895
N38	abundance	skin	feces	abscess		Prominent source
	Enterobacteriaceae family	0.00203611	0.00896869	0.886488		N38	Neither
	Pseudomonas	0.173652	0.061097	0.0542451
	Acinetobacter	0.0762031	0.00745323	0.00766435
	Prevotella	0.0375809	0.238087	0.0063264
	Bacteroides	0.0967096	0.0478921	0.00298976
N40	abundance	skin	feces	abscess		Prominent source
	Pseudomonas	0.0314622	0.0107206	0.234784		N40	Both
	Bacteroides	0.0273026	0.409046	0.143462
	Porphyromonas	0.238543	0.00575547	0.0912874
	Anaerococcus	0.0716456	0.0018753	0.07044
	Finegoldia	0.0678941	0.005383	0.0510817
N41	abundance	skin	feces	abscess		Prominent source
	Bacteroides	0.202899	0.330289	0.411925		N41	Both
	Agathobacter	0.0582278	0.0564807	0.111103
	Ruminococcaceae family	0.0382346	0.0273988	0.0900359
	Faecalibacterium	0.033603	0.0817824	0.0735513
	Collinsella	0.00892359	0.0122508	0.0315534
N42	abundance	skin	feces	abscess		Prominent source
	Prevotella	0.160633	0.158129	0.245705		N42	Skin
	Fusobacterium	0.182981	0.00799076	0.215689
	Peptostreptococcus	0.136724	0.00648601	0.122333
	Streptococcus	0.0326362	0.051473	0.0792719
	Bacteroides	0.0483703	0.168986	0.0459662
N46	abundance	skin	feces	abscess		Prominent source
	Prevotella	0.212466	0.221552	0.256858		N46	Both
	Faecalibacterium	0.0583976	0.0993709	0.076568
	Megamonas	0.0374832	0.042073	0.0740023
	Lachnospiraceae family	0.0287671	0.0312881	0.0469117
	Blautia	0.0529966	0.0370964	0.0458679
N50	abundance	skin	feces	abscess		Prominent source
	Escherichia-Shigella	0.027756	0.217227	0.951676		N50	Feces
	Streptococcus	0.024504	0.0326825	0.0164939
	Prevotella	0.138839	0.197901	0.0051688
	Bacteroides	0.0122055	0.0789915	0.00506079
	Acinetobacter	0.00038855	0	0.00351787
N54	abundance	skin	feces	abscess		Prominent source
	Escherichia-Shigella	0.00365972	0.356018	0.909867		N54	Feces
	Bacteroides	0.00383912	0.0555378	0.0664881
	Fusobacterium	0.00087905	0	0.00935847
	Weissella	0.416723	0.0706189	0.00643932
	Staphylococcus	0.0188906	0	0.00106463
N55	abundance	skin	feces	abscess		Prominent source
	Escherichia-Shigella	0.423018	0.630589	0.774043		N55	Feces
	Enterococcus	0.0142852	0.196694	0.121172
	Prevotella	0.00394322	0.0973983	0.0619432
	Bacteroides	0.00222254	0.0662209	0.029639
	Staphylococcus	0.527603	0.000922198	0.006219
N64	abundance	skin	feces	abscess		Prominent source
	Bacteroides	0.181493	0.255186	0.355522		N64	Both
	Prevotellaceae_NK3B31_group	0.145526	0.021733	0.156158
	Faecalibacterium	0.0759944	0.0792175	0.0904272
	Ruminococcaceae family	0.0413008	0.0427173	0.0602458
	Escherichia-Shigella	0.00573021	0.416822	0.0348466
N65	abundance	skin	feces	abscess		Prominent source
	Fusobacterium	0	0.000105605	0.549971		N65	Neither
	Bacteroides	0.000132892	0.217819	0.374407
	Enterobacteriaceae family	0	0.00198889	0.0676137
	Escherichia-Shigella	0.000327483	0.0573787	0.000599648
	Acinetobacter	0.141482	0.000616029	0.00050637
N66	abundance	skin	feces	abscess		Prominent source
	Prevotella	0.247694	0.305192	0.268758		N66	Both
	Peptoniphilus	0.000795408	0.00148348	0.164718
	Streptococcus	0.00814756	0.0229161	0.109181
	Bacteroides	0.093009	0.136055	0.0884136
	Pseudomonas	8.59901e-05	0.00214741	0.0624037
N67	abundance	skin	feces	abscess		Prominent source
	Escherichia-Shigella	0.0210364	0.367624	0.56939		N67	Feces
	Fusobacterium	0.126524	0.199371	0.100415
	Bacteroides	0.128008	0.0947089	0.0930326
	Anaerococcus	0.0433094	0.000373721	0.0397143
	Prevotellaceae_Ga6A1_group	0.0288923	0.0402144	0.0274984
N69	abundance	skin	feces	abscess		Prominent source
	Bacteroides	0.00399808	0.00933523	0.927845		N69	Neither
	Porphyromonas	0.0186207	0.00183395	0.0379211
	Megamonas	0.0922796	0.266709	0.00400863
	Faecalibacterium	0.00260985	0.00219247	0.00277971
	Escherichia-Shigella	0.0133639	0.0336454	0.00242859
N70	abundance	skin	feces	abscess		Prominent source
	Prevotella	0.201903	0.382353	0.416267		N70	Feces
	Streptococcus	0.00525672	0.00210119	0.158328
	Gemella	0.00429566	0	0.147826
	Bacteroides	0.03288	0.031174	0.0753348
	Dialister	0.00270117	3.82034e-05	0.0608008
N71	abundance	skin	feces	abscess		Prominent source
	Bacteroides	0.19152	0.348069	0.316641		N71	Both
	Faecalibacterium	0.0839911	0.0432015	0.143819
	Megamonas	0.0572237	0.0465119	0.075153
	Coprococcus	0.0360849	0.134761	0.042299
	Lachnospiraceae family	0.0258692	0.0373572	0.0412129
N73	abundance	skin	feces	abscess		Prominent source
	Bacteroides	0.0641995	0.304756	0.875698		N73	Feces
	Escherichia-Shigella	0.0275656	0.11453	0.100341
	Acinetobacter	0.0128613	0.00133797	0.00164024
	Akkermansia	0	0	0.000850495
	Muribaculaceae	0	0	0.000503354
N78	abundance	skin	feces	abscess		Prominent source
	Bacteroides	0.146409	0.331929	0.767181		N78	Feces
	Escherichia-Shigella	0.108695	0.167957	0.057985
	Lachnospiraceae family	0.0126504	0.0207207	0.0159188
	Faecalibacterium	0.0732368	0.0555429	0.0103591
	Agathobacter	0.0701737	0.0373655	0.00798318
N81	abundance	skin	feces	abscess		Prominent source
	Bacteroides	0.354769	0.388812	0.977349		N81	Both
	Escherichia-Shigella	0.0368599	0.00655121	0.00777036
	Acinetobacter	0.000663616	4.50255e-05	0.000381141
	Faecalibacterium	0.156369	0.155304	0.000368846
	Finegoldia	0.00230938	0.000348948	0.000139342
N82	abundance	skin	feces	abscess		Prominent source
	Prevotella	0.0256276	0.00543064	0.357356		N82	Neither
	Porphyromonas	0.00101976	2.65233e-05	0.107663
	Peptostreptococcus	0.000493161	5.30465e-05	0.101188
	Fusobacterium	0.00124126	3.31541e-05	0.0712968
	Peptoniphilus	0.00289209	4.64157e-05	0.0518943
N83	abundance	skin	feces	abscess		Prominent source
	Porphyromonas	0.404849	0.00190211	0.659199		N83	Skin
	Anaerococcus	0.107344	0.00267157	0.11445
	Ezakiella	0.040354	0.00107725	0.0881088
	Prevotella	0.114036	0.0231762	0.03413
	Peptoniphilus	0.03794	0.00366264	0.0267521
N84	abundance	skin	feces	abscess		Prominent source
	Porphyromonas	0.000705674	0.000114419	0.408903		N84	Neither
	Aeromonas	0.0110819	0.010437	0.200869
	Peptostreptococcus	0.00693139	0.000507422	0.133316
	Anaerococcus	0.00091459	0.00018904	0.0551949
	Prevotella	0.191767	0.0267989	0.0511832
N85	abundance	skin	feces	abscess		Prominent source
	Bacteroides	0.0195443	0.374736	0.425214		N85	Feces
	Faecalibacterium	0.14722	0.112958	0.122312
	Escherichia-Shigella	0.0109271	0.0450211	0.0521524
	Alistipes	0.00118496	0.0289602	0.038505
	Subdoligranulum	0.107396	0.0273113	0.0350119
N86	abundance	skin	feces	abscess		Prominent source
	Streptococcus	0.00913556	0.00203263	0.760107		N86	Neither
	Enterobacteriaceae family	3.79769e-05	4.49697e-05	0.115718
	Aeromonas	0.0438465	0.0202319	0.0413673
	Pseudomonas	0.00378081	0.0013311	0.00171275
	Acinetobacter	0.004207	0.000301297	0.00128005
N87	abundance	skin	feces	abscess		Prominent source
	Bacteroides	0.248436	0.352307	0.842529		N87	Both
	Escherichia-Shigella	0.215644	0.00198478	0.0912634
	Aeromonas	0.187988	0.00182254	0.0207738
	Sutterella	0	0.000427242	0.00680682
	Veillonella	0.00253916	0.000108162	0.00390223
N88	abundance	skin	feces	abscess		Prominent source
	Fusobacterium	0.0346976	0.000339706	0.340462		N88	Neither
	Bacteroides	0.0935985	0.295266	0.17464
	Enterobacteriaceae family	0.0226006	0.000482383	0.133126
	Escherichia-Shigella	0.243527	0.385818	0.11338
	Aeromonas	0.0014024	0.0337532	0.044561
N89	abundance	skin	feces	abscess		Prominent source
	Bacteroides	0.122545	0.386359	0.617148		N89	Feces
	Escherichia-Shigella	0.00383272	0.048476	0.147239
	Aeromonas	0.115434	0.000810216	0.0679659
	Dialister	0.000291832	5.70574e-05	0.0288962
	Fusobacterium	0.00153212	0.00116397	0.0287124
N90	abundance	skin	feces	abscess		Prominent source
	Escherichia-Shigella	0.544432	0.543408	0.441945		N90	Both
	Enterobacteriaceae family	0.000655881	0.00151316	0.386814
	Bacteroides	0.0176651	0.00113854	0.0205172
	Fusobacterium	0	0.000301163	0.016696
	Aeromonas	0.011784	0.000506835	0.00423346
N91	abundance	skin	feces	abscess		Prominent source
	Aeromonas	0.000235225	0.000501114	0.176794		N91	Neither
	Bacteroides	0.0149656	0.240263	0.118988
	Faecalibacterium	0.00285407	0.0688765	0.0856754
	Agathobacter	0.0012284	0.0401211	0.0678694
	Bifidobacterium	0.00733903	0.00345449	0.0370197
N93	abundance	skin	feces	abscess		Prominent source
	Aeromonas	0.0520197	0.02318	0.445995		N92	Neither
	Bacteroides	0.380841	0.360088	0.11029
	Acinetobacter	0.00172094	0.00058742	0.0767302
	Pseudomonas	0.00509376	0.00256749	0.0374232
	Comamonadaceae family	0.00217564	0.00102964	0.0174698
N94	abundance	skin	feces	abscess		Prominent source
	Bacteroides	0.088598	0.17468	0.624351		N93	Feces
	Escherichia-Shigella	0.0539645	0.287849	0.204335
	Fusobacterium	0.0113714	0.0194375	0.0752039
	Faecalibacterium	0.084106	0.0864257	0.0336852
	Parvimonas	0.0075006	0.00217919	0.0217642
N95	abundance	skin	feces	abscess		Prominent source
	Bacteroides	0.395563	0.373245	0.269728		N95	Both
	Peptoniphilus	0.00711566	0.000516961	0.188405
	Peptostreptococcus	0.0121866	0.000631173	0.145256
	Escherichia-Shigella	0.0674984	0.152443	0.0556654
	Dialister	0.00220087	6.61229e-05	0.0538905
N96	abundance	skin	feces	abscess		Prominent source
	Enterobacteriaceae family	0.0450194	0.0831912	0.817377		N96	Neither
	Escherichia-Shigella	0.0891247	0.186075	0.0788286
	Aeromonas	0.00289723	0.000696358	0.0418563
	Pseudomonas	0.000342109	0.000123928	0.002886
	Bacteroides	0.427187	0.32059	0.002294
N98	abundance	skin	feces	abscess		Prominent source
	Escherichia-Shigella	0.251435	0.187157	0.390391		N98	Both
	Bacteroides	0.168814	0.38737	0.19752
	Enterobacteriaceae family	0.0577027	0.0216578	0.0636211
	Bifidobacterium	0.149921	0.0198517	0.0422659
	Gardnerella	0.103051	0.0241782	0.0212409
N99	abundance	skin	feces	abscess		Prominent source
	Escherichia-Shigella	0.0772741	0.0619731	0.542947		N99	Neither
	Fusobacterium	0.00356018	0.00810103	0.353382
	Morganella	0.000797668	0.00867504	0.0415439
	Bacteroides	0.355373	0.385435	0.00943107
	Faecalibacterium	0.10558	0.124266	0.00610662
