# Supplementary material for: The bacterial composition signatures of perianal abscess and origin of infecting microbes
Source: PeerJ. 2025 Jan 23;13:e18855. doi: 10.7717/peerj.18855 (PMC11766672; doi:10.7717/peerj.18855)
Supplement: Supplemental Information 4 [file peerj-13-18855-s004.xlsx]

## Sheet: Sheet1
Table S4. Prediction of microbe source in abscess on OTU level
Sample	predicted source	Suspected transferred microbe	Corresponding OTU id	Abundance in skin	Abundance in feces	Abundance in abscess	Agreement with finding on genus level
N107	Feces	Prevotella	6b6d13f1332283e053c18c3b7774b85c	0.0113443	0.263039	0.233331	Yes
N109	Skin	Prevotella	c5ccea21b43ffc03a1ab4d769be69f09	0.178175	0.0102982	0.540367	Yes
N112	Skin	Staphylococcus	04be702b895fe5ed0568344daf564276	0.518227	0.00228063	0.983591	Yes
N117	Feces	Bacteroides	47f3d645d96038371757074de1d8fb8d	0.155691	0.497364	0.457353	Yes
N120	Skin	Enterobacteriaceae family	c27ad79848adcd406bf90804cb13ec9b	0.877934	0.0102446	0.958641	Yes
N125	Feces	Bacteroides	7440aa816171ce9e81d9b67d2dda61c6	5.88374e-05	0.0128782	0.368389	No
N129	Feces	Escherichia-Shigella	ffc36e27c82042664a16bcd4d380b286	0.0447803	0.257178	0.264486	Yes
N136	Skin	Prevotella	608ebe0051f9a43473d71082ad13908a	0.0946316	0.0406092	0.173438	Yes
N140	Feces	Bacteroides	47f3d645d96038371757074de1d8fb8d	0.00505678	0.180447	0.964358	Yes
N148	Feces	Bacteroides	b6635d67cb594473ddba9f8cfba5d13d	0.0192173	0.153495	0.124052	Yes
N155	Feces	Prevotella	6b6d13f1332283e053c18c3b7774b85c	0.0179752	0.227246	0.329991	Yes
		Fusobacterium	c4dd6f812a77b4e9a083471091576a9a	0.00459744	0.196104	0.0937923
N157	Feces	Escherichia-Shigella	ffc36e27c82042664a16bcd4d380b286	0.126292	0.181937	0.285805	Yes
		Bacteroides	b6635d67cb594473ddba9f8cfba5d13d	0.0517309	0.149117	0.155281
N158	Feces	Prevotella	c5ccea21b43ffc03a1ab4d769be69f09	0.000116933	0.407445	0.641097	Yes
N159	Skin	Staphylococcus	04be702b895fe5ed0568344daf564276	0.241309	0.14945	0.991112	Yes
N167	Feces	Escherichia-Shigella	ffc36e27c82042664a16bcd4d380b286	0.0766167	0.0825344	0.423283	Yes
		Bacteroides	47f3d645d96038371757074de1d8fb8d	0.053839	0.166576	0.0683681
N18	Feces	Bacteroides	47f3d645d96038371757074de1d8fb8d	0.0237497	0.0178089	0.465054	Yes
		Escherichia-Shigella	ffc36e27c82042664a16bcd4d380b286	0.00278627	0.0607324	0.150801
N20	Skin	Prevotella	6b6d13f1332283e053c18c3b7774b85c	0.0363375	0.00434234	0.166565	Yes
N22	Feces	Bacteroides	47f3d645d96038371757074de1d8fb8d	0.0222927	0.0987674	0.435012	Yes
N23	Feces	Escherichia-Shigella	ffc36e27c82042664a16bcd4d380b286	0.0122463	0.316135	0.571637	Yes
		Veillonella	5ffa45b1ff8681e9b0a43ea196e86275	0.00620689	0.237481	0.0897071
N25	Feces	Porphyromonas	69023d08c66f627325cbd2f397433f0d	0.0092015	0.0819192	0.0680225	Yes
		Fusobacterium	e47b7c57183d489a185e684d3dc8f4e6	0.00393948	0.0473512	0.155523
		Prevotella	608ebe0051f9a43473d71082ad13908a	0.00159455	0.0459557	0.0291934
		Bacteroides	7440aa816171ce9e81d9b67d2dda61c6	0	0.0181701	0.029416
N32	Feces	Enterobacteriaceae family	c27ad79848adcd406bf90804cb13ec9b	0.163943	0.238235	0.507042	Yes
		Escherichia-Shigella	ffc36e27c82042664a16bcd4d380b286	0.00911794	0.495749	0.398983
N35	Feces	Prevotella	85eba09a78ea7ff269baa328f3371be6	0.00103715	0.0577576	0.292508	Yes
N42	Skin	Prevotella	c5ccea21b43ffc03a1ab4d769be69f09	0.146895	0.00176419	0.236835	Yes
		Fusobacterium	e30a5fdf3ff65ca0f61cb6053b3b7ae5	0.182779	0.00799076	0.215689
N50	Feces	Escherichia-Shigella	ffc36e27c82042664a16bcd4d380b286	0.027756	0.216957	0.951367	Yes
N54	Feces	Escherichia-Shigella	ffc36e27c82042664a16bcd4d380b286	0.00365972	0.355918	0.909764	Yes
N55	Feces	Escherichia-Shigella	ffc36e27c82042664a16bcd4d380b286	0.422856	0.630447	0.773994	Yes
		Enterococcus	892a20bbdc3ce599dc0c5d9f0866c352	0.0142494	0.196694	0.121172
N67	Feces	Escherichia-Shigella	ffc36e27c82042664a16bcd4d380b286	0.0210364	0.367358	0.569314	Yes
N70	Feces	Prevotella	c5ccea21b43ffc03a1ab4d769be69f09	0.0262035	0.000445707	0.399852	Yes
N73	Feces	Bacteroides	47f3d645d96038371757074de1d8fb8d	0.0148512	0.132158	0.87371	Yes
N78	Feces	Bacteroides	47f3d645d96038371757074de1d8fb8d	0.0154715	0.0458468	0.728964	Yes
N83	Skin	Porphyromonas	1693b478615d9008956285999b2725fa	0.240458	0.00100338	0.373894	Yes
		Porphyromonas	69023d08c66f627325cbd2f397433f0d	0.158599	0.000849487	0.280467
N85	Feces	Bacteroides	1f0481c4fc1ddc5a118dd691b40a1670	0.00353238	0.17728	0.204209	Yes
N89	Feces	Bacteroides	47f3d645d96038371757074de1d8fb8d	0.00330256	0.0113088	0.560121	No
N94	Feces	Bacteroides	47f3d645d96038371757074de1d8fb8d	0.00265627	0.0131524	0.612879	Yes
		Escherichia-Shigella	ffc36e27c82042664a16bcd4d380b286	0.0539506	0.287668	0.204296
